# Supplementary material for: Trends of HIV-Related Cancer Mortality between 2001 and 2018: An Observational Analysis
Source: MDPI journal article supplement (doi:10.3390/tropicalmed6040213), 2021-12-20
Supplement: s1 [file s1]

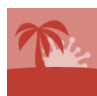

# Supplementary material of Trends of HIV-Related Cancer Mortality between 2001 and 2018: An Observational Analysis

**Table S1.** Completeness of data for each country in WHO mortality database.

| Country                  | Year | %     |
|--------------------------|------|-------|
| Australia                | 2016 | 100   |
| Austria                  | 2017 | 100   |
| Belgium                  | 2016 | 100   |
| Canada                   | 2015 | 100   |
| Croatia                  | 2016 | 100   |
| Denmark                  | 2015 | 100   |
| Egypt                    | 2015 | 93.99 |
| Estonia                  | 2016 | 100   |
| Finland                  | 2016 | 100   |
| France                   | 2015 | 100   |
| Germany                  | 2016 | 100   |
| Israel                   | 2016 | 100   |
| Italy                    | 2015 | 100   |
| Japan                    | 2016 | 100   |
| Kyrgyzstan               | 2016 | 91.01 |
| Latvia                   | 2015 | 100   |
| Malaysia                 | 2014 | 51.81 |
| Netherlands              | 2016 | 100   |
| New Zealand              | 2014 | 100   |
| Norway                   | 2016 | 100   |
| Poland                   | 2016 | 100   |
| Republic of Moldova      | 2017 | 79.62 |
| Romania                  | 2017 | 100   |
| Serbia                   | 2016 | 94.05 |
| South Africa             | 2015 | 92.47 |
| Spain                    | 2016 | 100   |
| Sweden                   | 2016 | 100   |
| Switzerland              | 2016 | 100   |
| Thailand                 | 2016 | 87.23 |
| United Kingdom           | 2016 | 100   |
| United States of america | 2016 | 100   |
